# Supplementary material for: Factors influencing the catalytic oxidation of benzyl alcohol using supported phosphine-capped gold nanoparticles
Source: Royal Society of Chemistry journal article supplement (doi:10.1039/c4cy01168f), 2014-11-20
Supplement: c4cy01168f1.pdf [file c4cy01168f1.pdf]

## Supporting Information

### Factors influencing the catalytic oxidation of benzyl alcohol using supported phosphine-capped gold nanoparticles

Rohul H. Adnan,<sup>1,2</sup> Gunther Andersson,<sup>3</sup> Matthew Polson,<sup>1</sup> Gregory Metha,<sup>4</sup>  
Vladimir Golovko<sup>1</sup>

<sup>1</sup>*MacDiarmid Institute for Advanced Materials and Nanotechnology, Department of Chemistry, University of Canterbury, Christchurch 8041, New Zealand*

<sup>2</sup>*Department of Chemistry, University of Malaya, Kuala Lumpur 50603, Malaysia*

<sup>3</sup>*Flinders Centre for NanoScale Science and Technology, Flinders University, Adelaide SA 5001, Australia*

<sup>4</sup>*Department of Chemistry, The University of Adelaide, South Australia 5005 Australia*

#### Synthesis of Au<sub>101</sub>(PPh<sub>3</sub>)<sub>21</sub>Cl<sub>5</sub>, denoted as Au<sub>101</sub>

The Au<sub>101</sub> cluster was synthesized following the method of Hutchison *et. al.*<sup>1</sup> Typically, tetrachloroauric acid, HAuCl<sub>4</sub>·3H<sub>2</sub>O (1.00 g, 2.539 mmol) in Milli-Q water (60 ml) was stirred in a 500 ml flask. Toluene (60 ml) was added to the solution followed by tetraoctylammonium bromide (TOAB, 1.40 g, 2.56 mmol). The mixture was stirred vigorously for 5 min before the addition of triphenylphosphine (2.30 g, 8.76 mmol). The mixture was vigorously stirred for a further 10 min. A solution of sodium borohydride, NaBH<sub>4</sub> (2.00 g, 52.9 mmol) in deionised water (10 ml) was added to the mixture *rapidly, with stirring* and the mixture turned reddish-brown. The mixture was stirred for a further 3 h.

The aqueous and organic layers were separated using a 250 ml separating funnel. The organic layer was washed 3 times with 100 ml of Milli-Q water. The organic layer was filtered on a #3 glass frit funnel and the filtrate was evaporated to dryness. The crude product was completely dissolved in chloroform (35 ml) before pentane (300 ml) was added slowly to the solution to precipitate the product. The suspension was filtered through a #3 glass frit funnel to collect the crude product. The product was washed with the following solvents to complete the purification:

- 2 × (100 ml hexanes followed by 100 ml 2:3 MeOH:H<sub>2</sub>O)
- 2 × (100 ml hexanes followed by 100 ml 1:1 MeOH:H<sub>2</sub>O)
- 100 ml hexanes
- 2 × (150 ml 3:1 pentane:chloroform)
- 2 × (150 ml 2:1 pentane:chloroform)
- 2 × (150 ml 1:1 pentane:chloroform)

The <sup>1</sup>H NMR of the Au<sub>101</sub> cluster was a single broad band at δ 6-8 ppm (Figure S1). TEM image (Figure S2) shows the average particle size of Au<sub>101</sub> around 1.6 ± 0.4 nm. Thermogravimetric showed the decomposition of phosphine ligands at 250 °C (Figure S3).

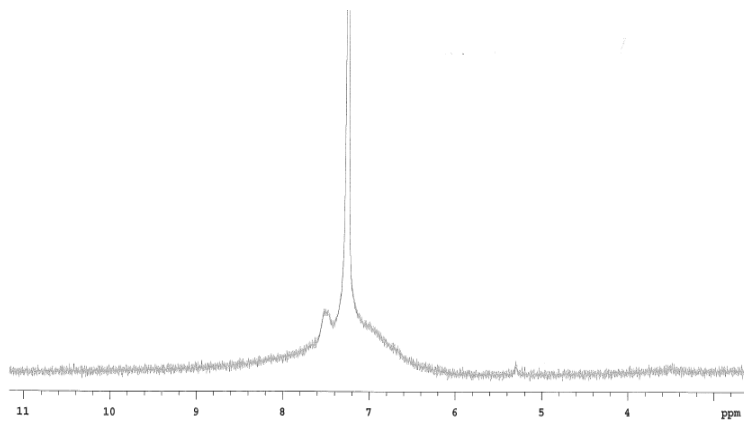

**Figure S1**  $^1\text{H}$  NMR of  $\text{Au}_{101}$  cluster.

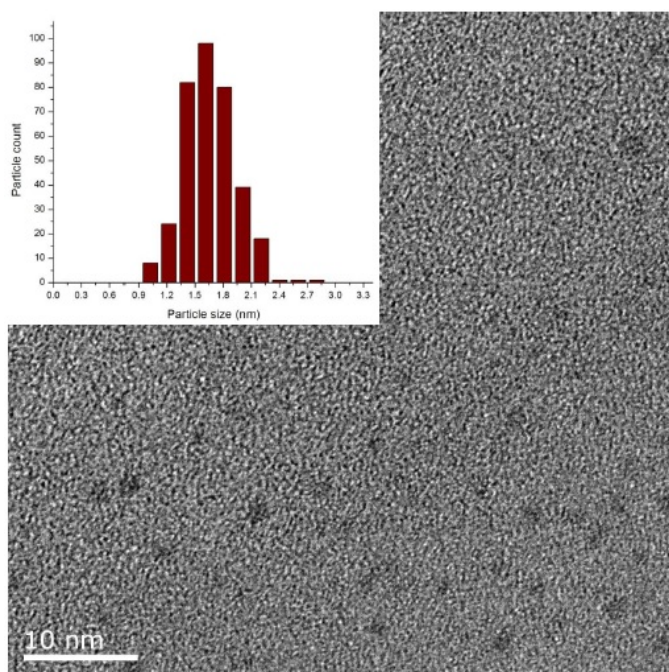

**Figure S2** A representative TEM image of  $\text{Au}_{101}$  cluster on a holey carbon film coated Cu 300 Mesh grid.

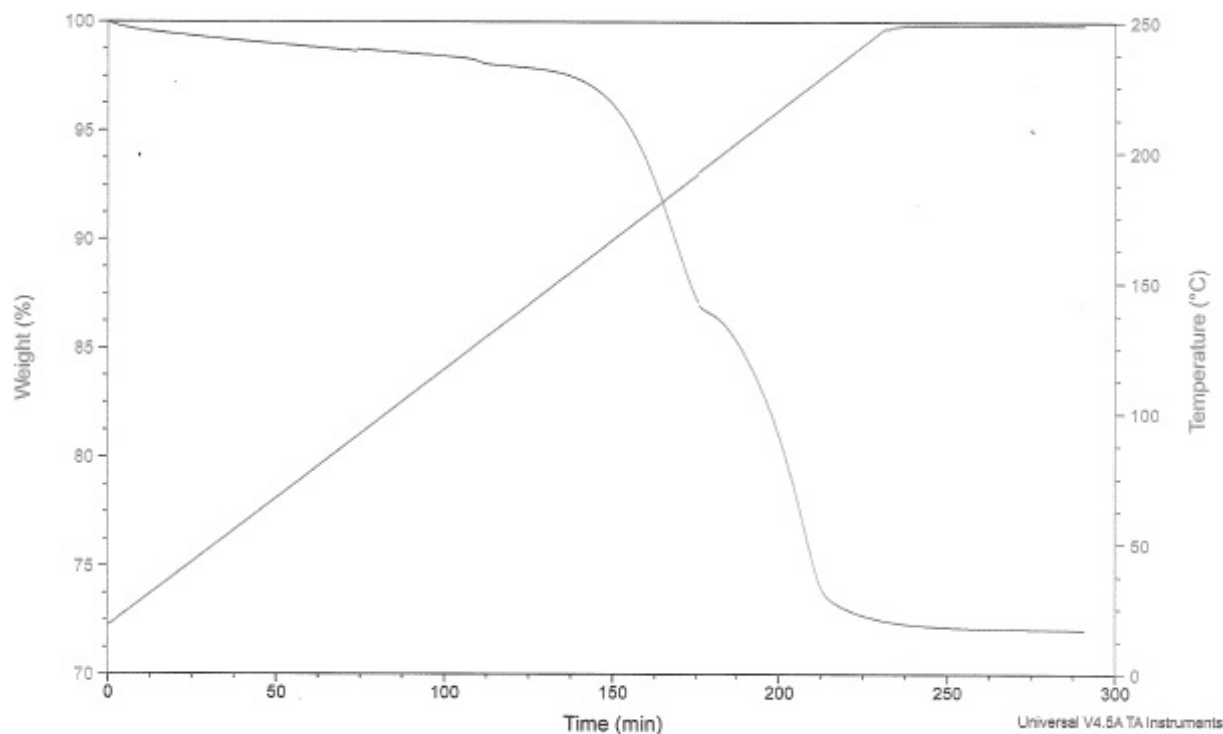

**Figure S3** TGA plot of Au<sub>101</sub> cluster.

#### **Synthesis of Au<sub>9</sub>(PPh<sub>3</sub>)<sub>8</sub>(NO<sub>3</sub>)<sub>3</sub>, denoted as Au<sub>9</sub>**

The synthesis of Au<sub>9</sub> cluster followed the synthetic procedure from Simon *et. al* with improved yield.<sup>2</sup> Typically, Au(PPh<sub>3</sub>)NO<sub>3</sub> (0.856 g, 1.642 mmol) was suspended in EtOH (40 ml) while stirring. Then, NaBH<sub>4</sub> (0.0159 g, 0.042 mmol) dissolved in EtOH (23 ml) was added dropwise into Au(PPh<sub>3</sub>)NO<sub>3</sub> solution. The mixture was stirred at room temperature for 2 h and then filtered. The filtrate (dark-red brown solution) was dried *in vacuo* using rotary evaporator. The solid residue was then dissolved in minimum amount of dichloromethane (5 ml). After filtering and solvent removal *in vacuo* using rotary evaporator, the solid residue was washed then dissolved in tetrahydrofuran and left to precipitate overnight. The residue was collected on a fritted funnel #3 and washed with tetrahydrofuran and hexane alternately three times. The solid was then crystallised in methanol by vapour diffusion with diethyl ether. The yield was 0.311 g after crystallisation. The Au<sub>9</sub> cluster was verified using <sup>31</sup>P NMR (CD<sub>3</sub>OD): δ 56.9 ppm (s) with H<sub>3</sub>PO<sub>4</sub> acid as the external reference (Figure S4). The UV/Vis spectrum shown below (Figure S5) is identical to the published data, confirming the pure product as the Au<sub>9</sub> cluster.<sup>2</sup> Thermogravimetric analysis showed the decomposition of phosphine ligands at 230 °C. Elemental analysis showed, the experimentally obtained values and calculated values in parentheses, % C- 42.61 (42.6), %N- 1.01 (1.04), %H- 3.08 (2.99).

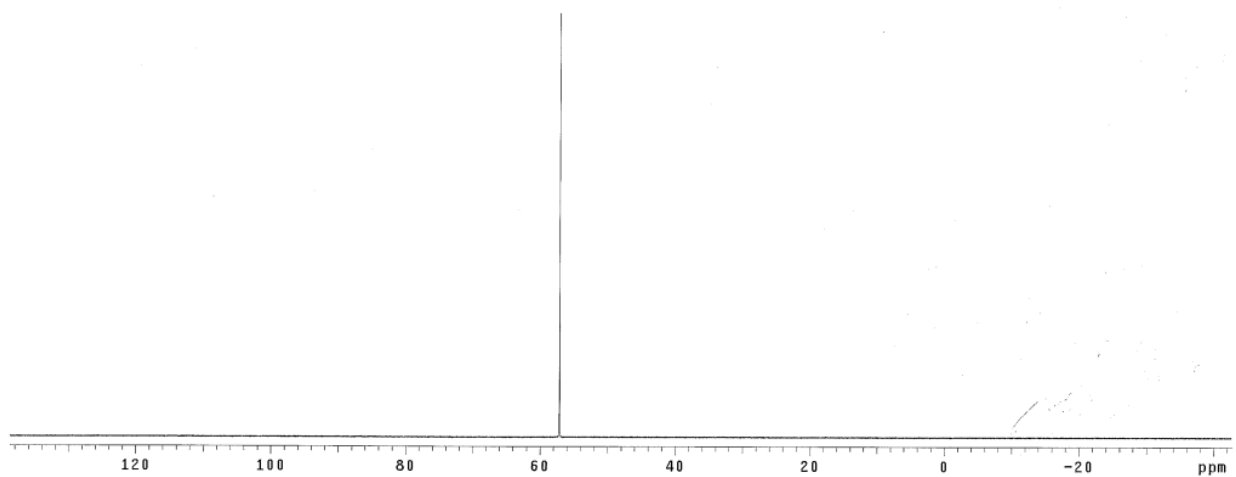

**Figure S4**  $^{31}\text{P}$  NMR spectrum of  $\text{Au}_9$  cluster in  $\text{CD}_3\text{OD}$ .

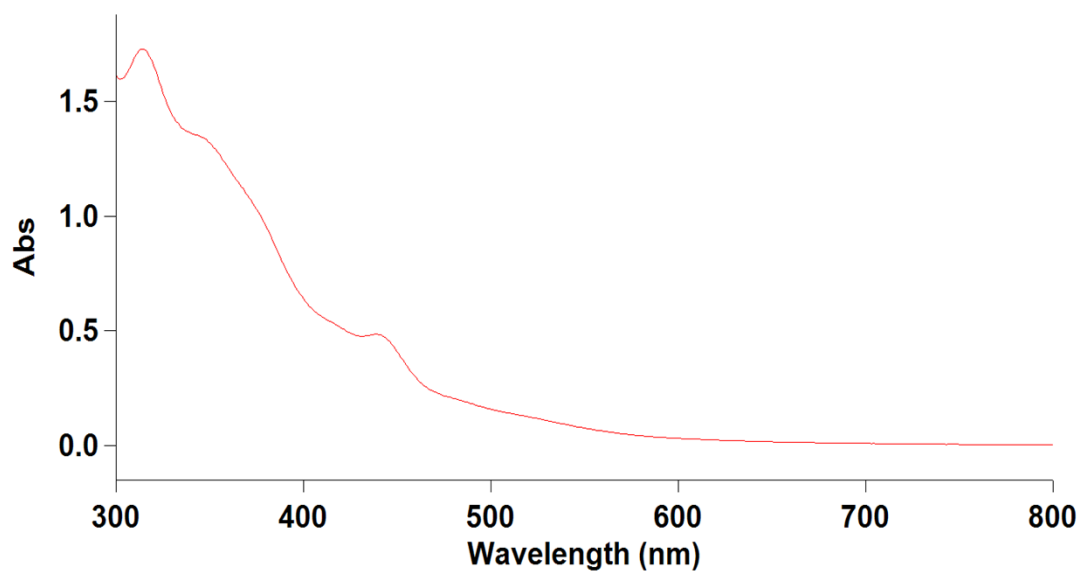

**Figure S5** UV-vis spectrum of  $\text{Au}_9$  cluster in dichloromethane solution.

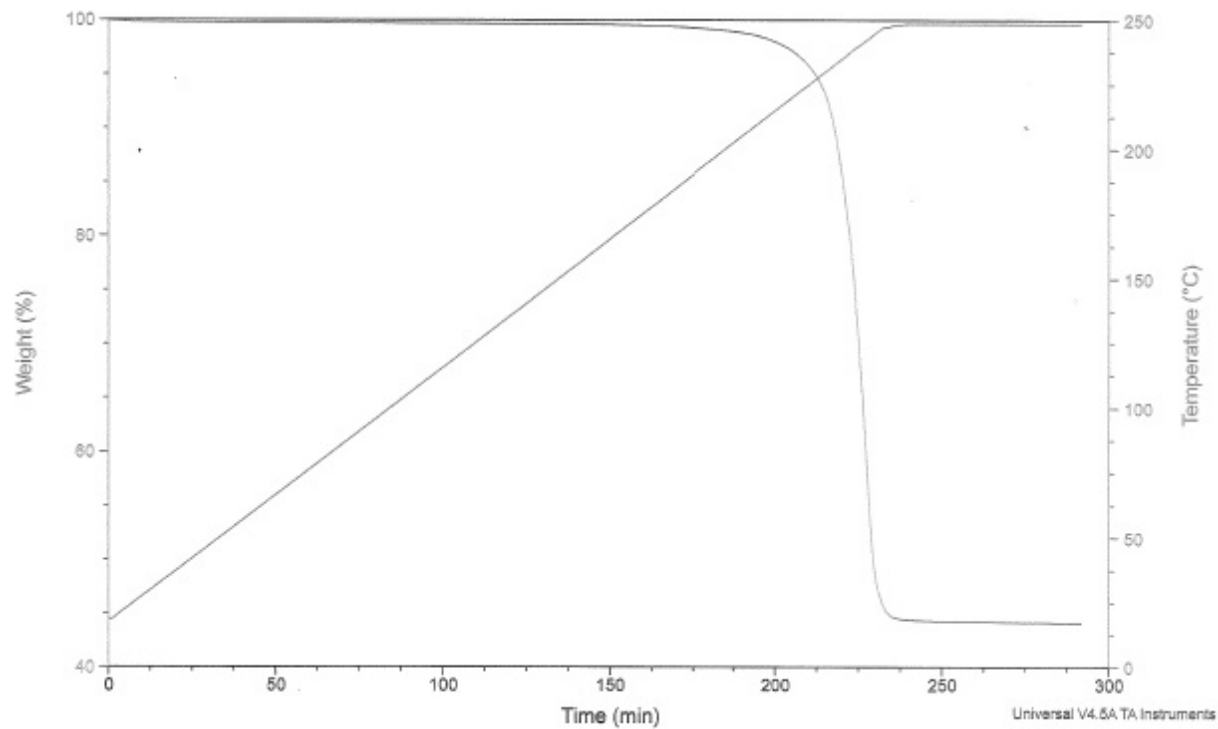

**Figure S6** TGA plot of Au<sub>9</sub> cluster.

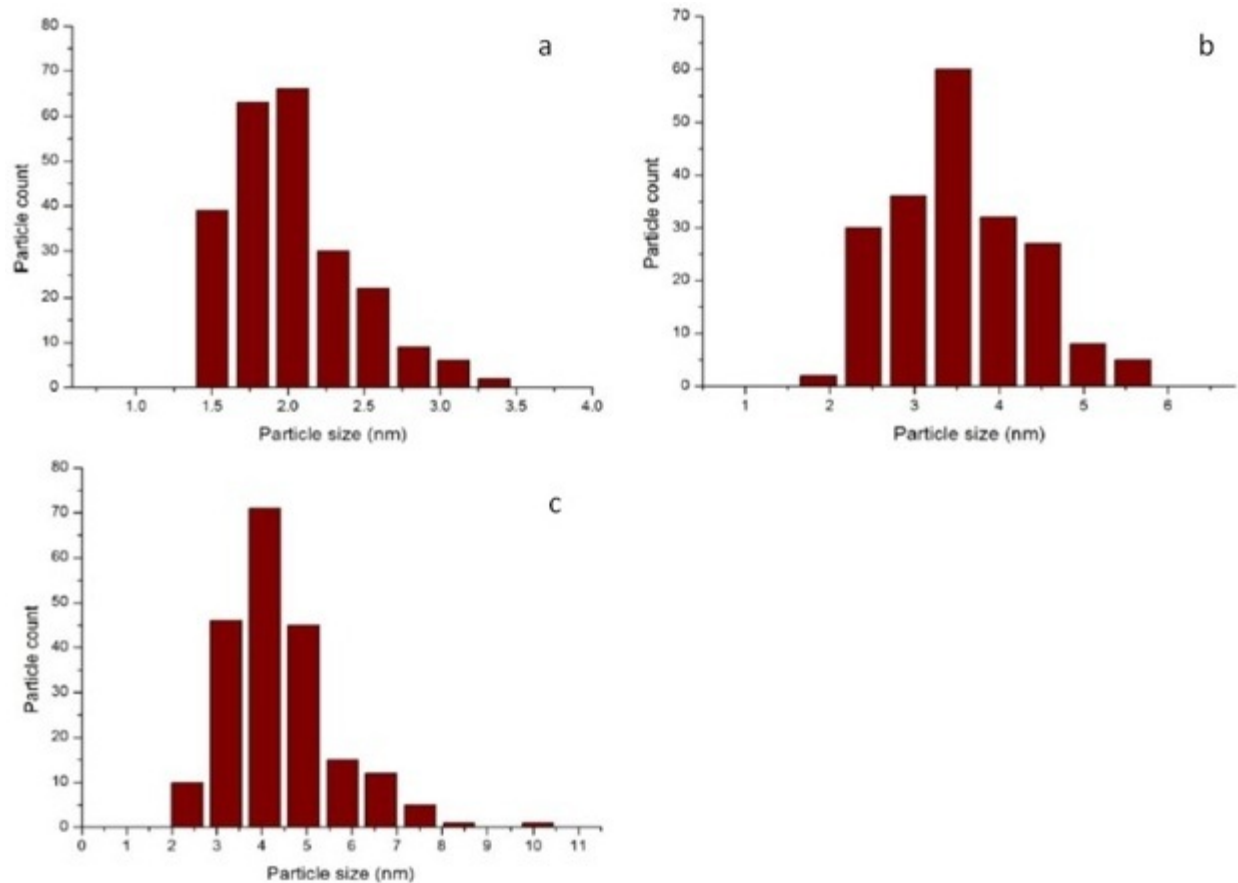

**Figure S7** Particle size distribution histograms for 0.17% Au<sub>101</sub>/TiO<sub>2</sub> catalysts before reaction, a) Au<sub>101</sub>/TiO<sub>2</sub>-untreated, b) Au<sub>101</sub>/TiO<sub>2</sub>-O<sub>2</sub>, and c) Au<sub>101</sub>/TiO<sub>2</sub>-O<sub>2</sub>-H<sub>2</sub>.

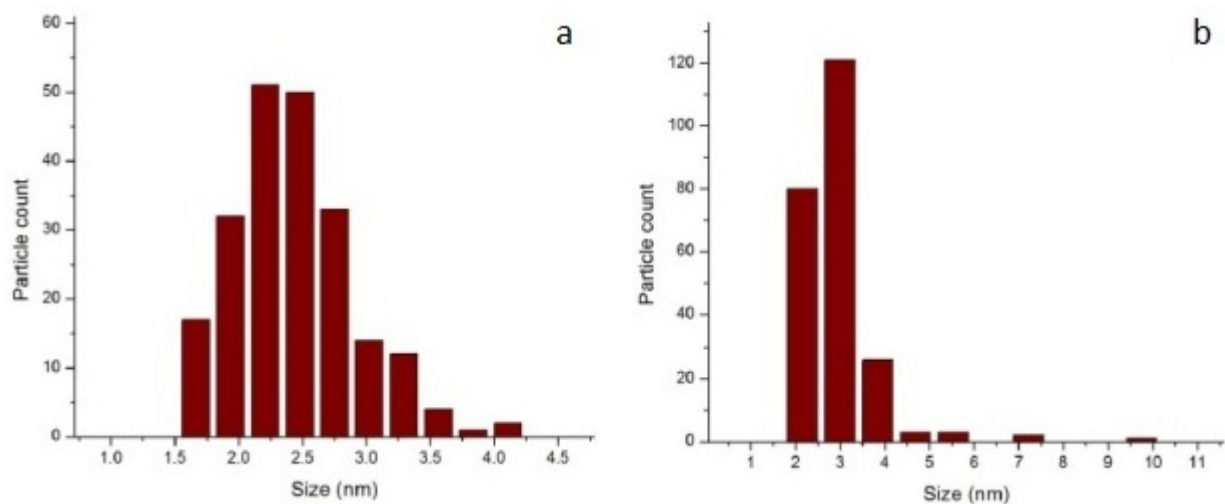

**Figure S8** Particle size distribution histograms for 0.17% Au<sub>9</sub>/TiO<sub>2</sub> catalysts before reaction, a) Au<sub>9</sub>/TiO<sub>2</sub>-O<sub>2</sub> and b) Au<sub>9</sub>/TiO<sub>2</sub>-O<sub>2</sub>-H<sub>2</sub>. Note that the histogram for Au<sub>9</sub>/TiO<sub>2</sub>-untreated is not available due to limited resolution of TEM to image very small cluster *ca.* ~ 1 nm.

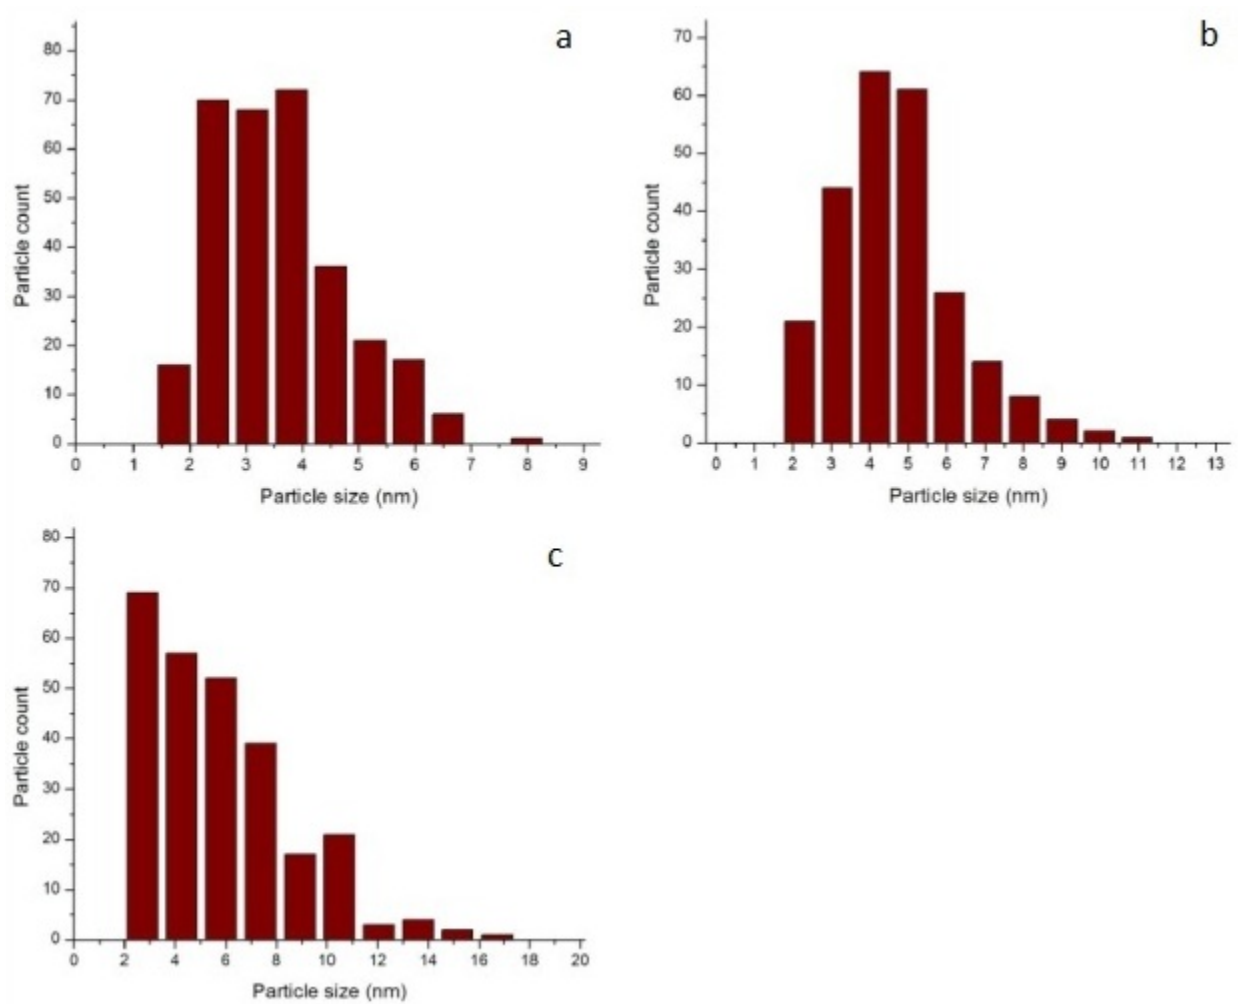

**Figure S9** Particle size distribution histograms for 0.5% Au<sub>101</sub>/SiO<sub>2</sub> catalysts before reaction, a) Au<sub>101</sub>/SiO<sub>2</sub>-untreated, b) Au<sub>101</sub>/SiO<sub>2</sub>-O<sub>2</sub>, and c) Au<sub>101</sub>/SiO<sub>2</sub>-O<sub>2</sub>-H<sub>2</sub>.

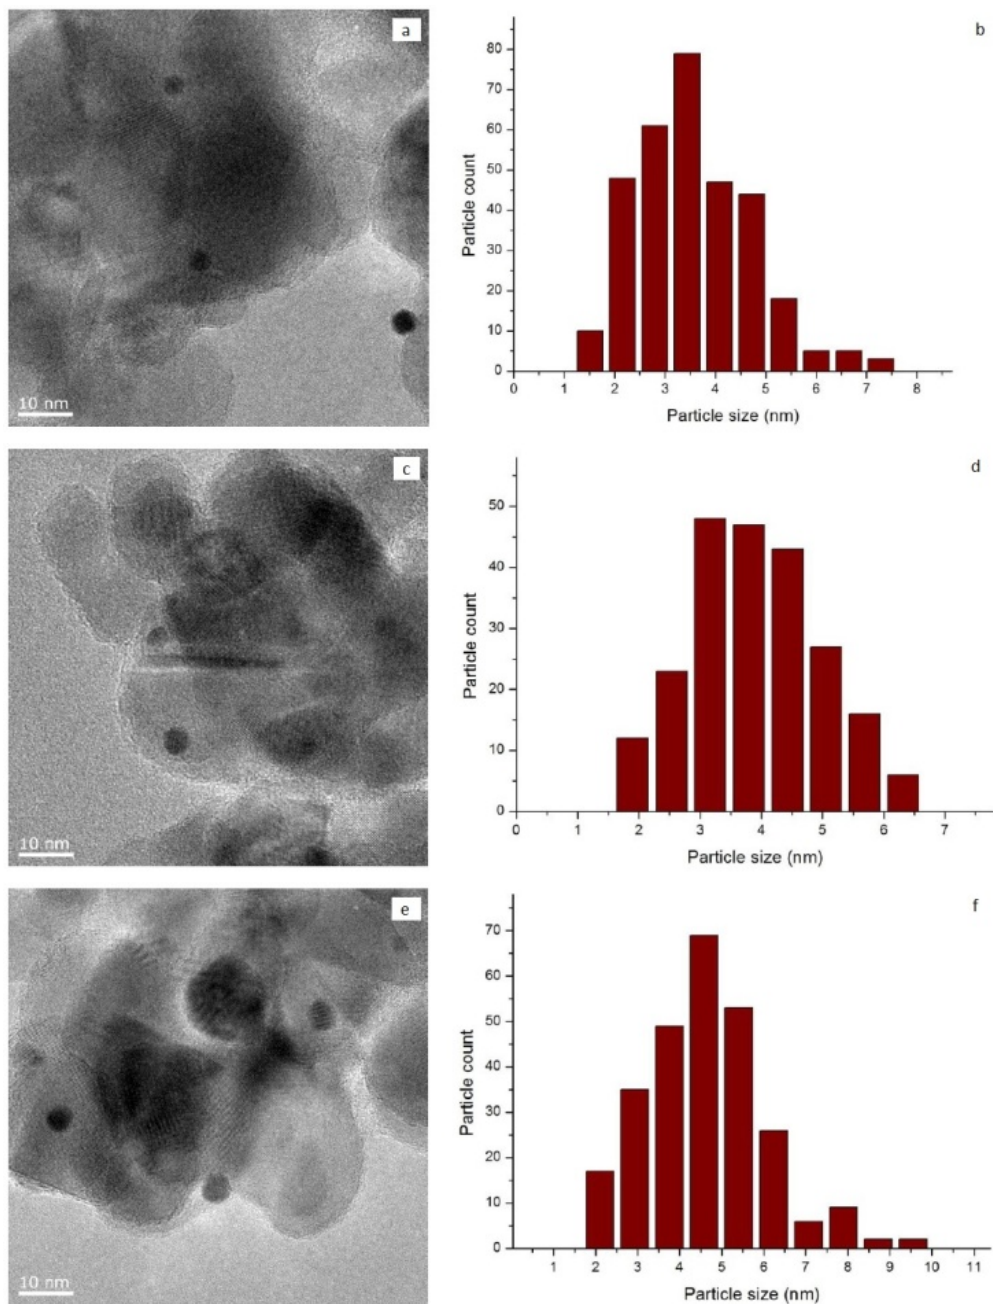

**Figure S10** Particle size distribution histograms for 0.17% Au<sub>101</sub>/TiO<sub>2</sub> catalysts after reaction, a) Au<sub>101</sub>/TiO<sub>2</sub>-untreated, b) Au<sub>101</sub>/TiO<sub>2</sub>-O<sub>2</sub>, and c) Au<sub>101</sub>/TiO<sub>2</sub>-O<sub>2</sub>-H<sub>2</sub>.



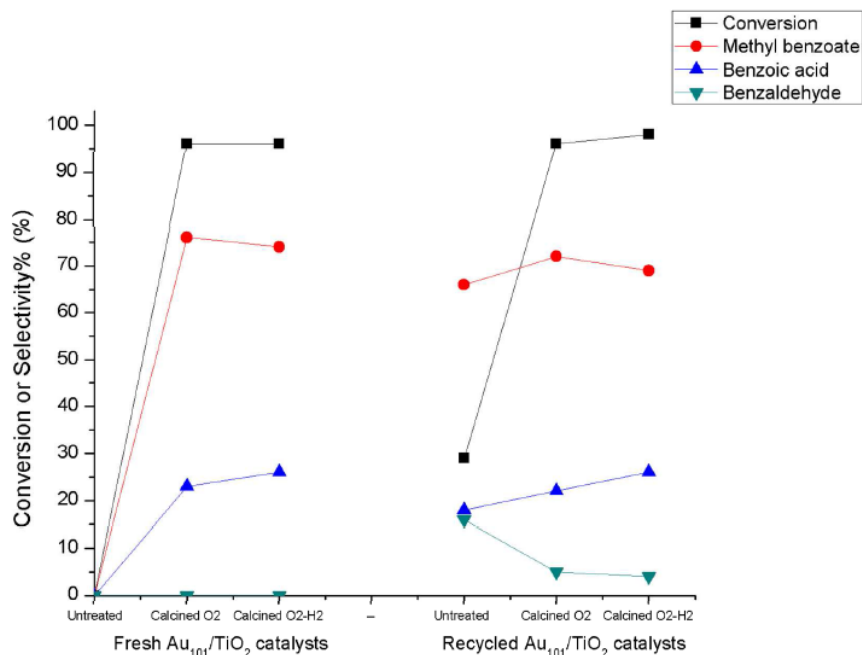

**Figure S11** Conversion and selectivity of benzyl alcohol oxidation using recycled 0.17%  $Au_{101}$ /anatase catalysts. O<sub>2</sub> (left: fresh catalysts, right: recycled catalysts). Reaction conditions: 2.5 mmol benzyl alcohol, 25 ml MeOH (solvent), 1.25 mmol anisole (internal standard), 2.5 mmol K<sub>2</sub>CO<sub>3</sub>, 5 bar O<sub>2</sub>, 80 °C, 4 hrs.

**Table S1** The Au content of the  $Au_{101}$ -based catalysts as measured using AAS.

| Catalyst                                               | Target loading (%) | Experimental measurement (%) |                            |                                       |
|--------------------------------------------------------|--------------------|------------------------------|----------------------------|---------------------------------------|
|                                                        |                    | Before reaction              | After 1 <sup>st</sup> test | After 2 <sup>nd</sup> test (recycled) |
| 0.17% $Au_{101}/TiO_2$ -untreated                      | 0.17               | 0.14 ± 0.01                  | 0.11 ± 0.02                | 0.11 ± 0.02                           |
| 0.17% $Au_{101}/TiO_2$ -O <sub>2</sub>                 | 0.17               | 0.13 ± 0.01                  | 0.13 ± 0.02                | 0.13 ± 0.02                           |
| 0.17% $Au_{101}/TiO_2$ -O <sub>2</sub> -H <sub>2</sub> | 0.17               | 0.13 ± 0.01                  | 0.11 ± 0.02                | 0.13 ± 0.01                           |
| 0.17% $Au_9/TiO_2$ -untreated                          | 0.17               | 0.17 ± 0.01                  | 0.15 ± 0.02                | 0.14 ± 0.02                           |
| 0.17% $Au_9/TiO_2$ -O <sub>2</sub>                     | 0.17               | 0.15 ± 0.01                  | 0.16 ± 0.01                | 0.15 ± 0.02                           |
| 0.17% $Au_9/TiO_2$ -O <sub>2</sub> -H <sub>2</sub>     | 0.17               | 0.17 ± 0.01                  | 0.16 ± 0.02                | 0.16 ± 0.02                           |
| 0.17% $Au_{101}/SiO_2$ -untreated                      | 0.17               | 0.18 ± 0.01                  | 0.17 ± 0.01                | 0.17 ± 0.02                           |
| 0.17% $Au_{101}/SiO_2$ -O <sub>2</sub>                 | 0.17               | 0.19 ± 0.01                  | 0.17 ± 0.02                | 0.18 ± 0.02                           |
| 0.17% $Au_{101}/SiO_2$ -O <sub>2</sub> -H <sub>2</sub> | 0.17               | 0.18 ± 0.02                  | 0.18 ± 0.01                | 0.17 ± 0.02                           |
| 0.5% $Au_{101}/SiO_2$ -untreated                       | 0.5                | 0.50 ± 0.01                  | 0.49 ± 0.01                | 0.48 ± 0.02                           |
| 0.5% $Au_{101}/SiO_2$ -O <sub>2</sub>                  | 0.5                | 0.48 ± 0.02                  | 0.49 ± 0.02                | 0.48 ± 0.01                           |
| 0.5% $Au_{101}/SiO_2$ -O <sub>2</sub> -H <sub>2</sub>  | 0.5                | 0.46 ± 0.02                  | 0.45 ± 0.02                | 0.47 ± 0.01                           |

**Table S2** Comparison of catalytic performances of gold nanoparticles in the oxidation of benzyl alcohol

| Catalysts                                                                   | Au content (mol %) | Au size (nm) | T (K) | Pressure (bar) | Solvent  | Time (h) | Conversion (%) | TOF (s <sup>-1</sup> ) | Reference |
|-----------------------------------------------------------------------------|--------------------|--------------|-------|----------------|----------|----------|----------------|------------------------|-----------|
| Au/MOF-5                                                                    | 1                  | 4.8          | 353   | 5              | Methanol | 3        | >99            | 0.01                   | 3         |
| Au/Al-MIL53                                                                 | 1                  | ~1.0         | 353   | 5              | Methanol | 23       | 98             | 0.001                  | 3         |
| Au/CPL-2                                                                    | 1                  | 2.1          | 353   | 5              | Methanol | 23       | 55             | 0.0007                 | 3         |
| Au <sub>25</sub> /CNT calcined 370 °C                                       | 1                  | n/d          | 353   | 5              | Toluene  | 8        | 33             | 0.011                  | 4         |
| Au <sub>13</sub> Cu <sub>8</sub> /CNT calcined 370 °C                       | 1                  | n/d          | 353   | 5              | Toluene  | 8        | 47             | 0.016                  | 4         |
| Au <sub>101</sub> /TiO <sub>2</sub> calcined O <sub>2</sub>                 | 0.13               | 3.5          | 353   | 3              | Methanol | 3        | 93             | 0.65                   | This work |
| Au <sub>101</sub> /TiO <sub>2</sub> calcined O <sub>2</sub>                 | 0.13               | 3.5          | 353   | 5              | Methanol | 4        | 96             | 0.51                   | This work |
| Au <sub>101</sub> /TiO <sub>2</sub> calcined O <sub>2</sub> -H <sub>2</sub> | 0.13               | 4.4          | 353   | 5              | Methanol | 4        | 97             | 0.51                   | This work |
| Au <sub>101</sub> /SiO <sub>2</sub> calcined O <sub>2</sub> -H <sub>2</sub> | 0.46               | 5.7          | 353   | 5              | Methanol | 4        | 99             | 0.15                   | This work |

## References

1. W. W. Weare, S. M. Reed, M. G. Warner and J. E. Hutchison, *Journal of the American Chemical Society*, 2000, **122**, 12890-12891.
2. F. Wen, U. Englert, B. Gutrath and U. Simon, *European Journal of Inorganic Chemistry*, 2008, **2008**, 106-111.
3. T. Ishida, M. Nagaoka, T. Akita and M. Haruta, *Chemistry – A European Journal*, 2008, **14**, 8456-8460.
4. H. Yang, Y. Wang, J. Lei, L. Shi, X. Wu, V. Mäkinen, S. Lin, Z. Tang, J. He, H. Häkkinen, L. Zheng and N. Zheng, *Journal of the American Chemical Society*, 2013, **135**, 9568-9571.
